# Supplementary material for: Nanostructured layered double hydroxide (NLDH) – Zn/Al-based materials: strategy to improve performance for zirconium sorption from acidic sulfate solution
Source: Royal Society of Chemistry journal article supplement (doi:10.1039/d4ra03845b), 2024-01-01
Supplement: d4ra03845b1.pdf [file d4ra03845b1.pdf]

## Supplementary Information

### **Nanostructured Layered double hydroxide (NLDH) - Zn/Al-based materials: Strategy to Improve Performance for Zirconium Sorption from Acidic Sulfate Solution**

*Ahmed M. Masoud<sup>1</sup>, Amal E. Mubark<sup>1\*</sup>, Mohamed H. Taha<sup>1</sup>, Saber Ibrahim<sup>2,3</sup>*

<sup>1</sup> Nuclear Materials Authority, P.O. Box 530, El Maddi, Cairo, Egypt

<sup>2</sup> Packaging Materials Department, National Research Centre, 12622, Dokki, Cairo, Egypt

<sup>3</sup> Nanomaterials Investigation Laboratory, central Laboratories Network, National Research Centre, Dokki, Cairo, 12622, Egypt

\*Corresponding author: [amal\\_mubark2014@yahoo.com](mailto:amal_mubark2014@yahoo.com), Tel.: +201018600164

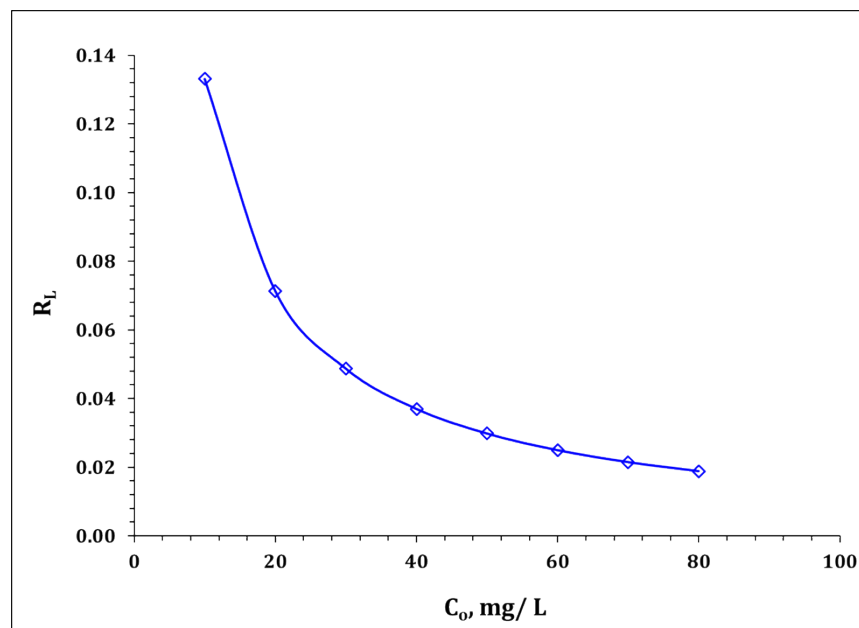

**Figure S1:** Separation factor  $R_L$  of Zr(IV) adsorption process.

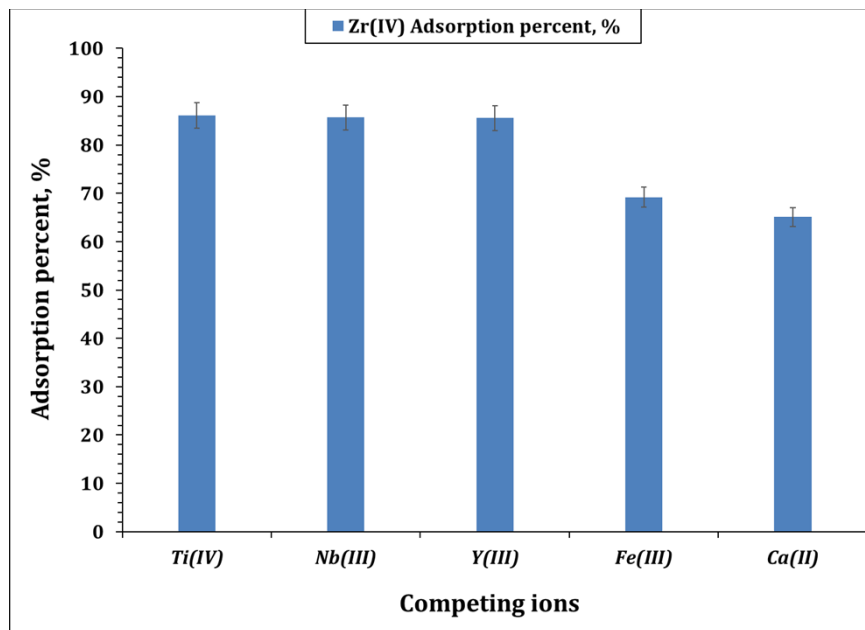

**Figure S2:** *Effect of co-existing elements on Zr(IV) ions adsorption process.*

**Table S1:** Kinetic, isotherm, and thermodynamics equations for Zr(IV) adsorption process [1-11].

| Kinetics                             | Equations                                                                                                                             |
|--------------------------------------|---------------------------------------------------------------------------------------------------------------------------------------|
| Pseudo-first-order                   | $q_t = q_1(1 - e^{-k_1t})$                                                                                                            |
| Pseudo-second-order                  | $q_t = \frac{1}{(1   k_2q_2^2) + (t   q_2)}$                                                                                          |
| Intra-particle diffusion model (IPD) | $q_t = K_{id}t^{0.5} + C_i$                                                                                                           |
| Isotherms                            | Equations                                                                                                                             |
| Langmuir model                       | $q_e = \frac{q_m k_L C_e}{1 + k_L C_e}$                                                                                               |
| Freundlich model                     | $q_e = K_F C_e^{1/n_F}$                                                                                                               |
| Temkin model                         | $q_e = \frac{RT}{b_T} \ln K_T C_e$                                                                                                    |
| Sips model                           | $q_e = \frac{q_S (k_S C_e)^{m_S}}{1 + (k_S C_e)^{m_S}}$                                                                               |
| Thermodynamics                       | Equations                                                                                                                             |
|                                      | $\log K_C = -\frac{\Delta H^0}{2.303 R} X \frac{1}{T} + C$ $-\Delta G^0 = 2.303 RT \log K_C$ $\Delta G^0 = \Delta H^0 - T \Delta S^0$ |
| Fitting                              | Equations                                                                                                                             |
| Coordination coefficient ( $R^2$ )   | $R^2 = 1 - \frac{\sum_1^n (q_{exp} - q_{pred})^2}{\sum_1^n (q_{exp} - q_{exp}^-)^2}$                                                  |
| Chi-square coefficient ( $\chi^2$ )  | $\chi^2 = \sum \left[ \frac{(q_{exp} - q_{pred})^2}{q_{pred}} \right]$                                                                |

$q_e$  ( $\text{mg g}^{-1}$ ) is the equilibrium concentration of Zr(IV) species, and  $q_t$  ( $\text{mg g}^{-1}$ ) is the adsorbed amount of Zr(IV) species ions after time  $t$  (min),  $C_e$  ( $\text{mg L}^{-1}$ ) is equilibrium concentration of Zr(IV) species.  $k_1$  ( $\text{min}^{-1}$ ) and  $k_2$  ( $\text{min}^{-1}$ ) are the rate constants for the pseudo first and second order, respectively.  $K_{id}$  ( $\text{mg/g. min}^{0.5}$ ) is a rate constant, and  $C$  is the thickness of the boundary layer.  $q_m$  and  $q_s$  are the maximum sorption capacity ( $\text{mg. g}^{-1}$ ) of Langmuir and Sips models.  $K_L$  ( $\text{L. mg}^{-1}$ ),  $K_F$  ( $\text{L/ mg}$ ),  $K_T$  ( $\text{L min}^{-1}$ ), and  $K_S$  ( $\text{L/ mg}$ ) are represent the constants of Langmuir, Freundlich, Temkin, and Sips models.  $n$  refer to the sorption intensity,  $b_T$  is Temkin constant that refers to the adsorption heat,  $m_S$  is Sips constant.  $q_s$  is the theoretical isotherm saturation capacity ( $\text{mg/g}$ ).  $K_C$  is a non-dimensional equilibrium constant and it equals  $K_d \times 1000 \times \rho$  [8-10];  $T$  is the temperature (K),  $R$  is the universal gas constant ( $8.314 \text{ J mol}^{-1} \cdot \text{K}^{-1}$ ),  $\rho$  is solution density  $\text{g/ L}$ , and  $C$  is a constant.  $R^2$  and  $\chi^2$  are the coordination and Chi-square coefficients respectively, the number of test points is  $n$ , the experimental equilibrium capacity is  $q_{exp}$  ( $\text{mg g}^{-1}$ ), while the predicted capacity is  $q_{pred}$  ( $\text{mg g}^{-1}$ ).

## **References:**

- 1) Hu, Q., Pang, S. and Wang, D., 2022. In-depth insights into mathematical characteristics, selection criteria and common mistakes of adsorption kinetic models: a critical review. *Separation & Purification Reviews*, 51(3), pp.281-299.
- 2) Yao, C. and Chen, T., 2017. A film-diffusion-based adsorption kinetic equation and its application. *Chemical Engineering Research and Design*, 119, pp.87-92.
- 3) Elzoghby, A., Fahmy, H., Taha, M. and Ibrahim, S., 2023. Active carbon-based waste packaging materials for uranium sorption from aqueous solution. *Environmental Science and Pollution Research*, pp.1-16.
- 4) Abou-Hadid, A.F., El-Behairy, U.A., Elmalih, M.M., Amdeha, E., El Naggar, A.M., Taha, M.H. and Hussein, A.E., 2022. Production of efficient carbon fiber from different solid waste residuals for adsorption of hazardous metals from wastewater samples. *Biomass Conversion and Biorefinery*, pp.1-16.
- 5) Wang, J. and Guo, X., 2020. Adsorption isotherm models: Classification, physical meaning, application and solving method. *Chemosphere*, 258, p.127279.
- 6) Al-Ghouti, M.A. and Da'ana, D.A., 2020. Guidelines for the use and interpretation of adsorption isotherm models: A review. *Journal of hazardous materials*, 393, p.122383.
- 7) M. H. Taha, "Sorption of U(VI), Mn (II), Cu(II), Zn(II), and Cd(II) from multi-component phosphoric acid solutions using MARATHON C resin," *Environ. Sci. Pollut. Res. Int.*, vol. 28, no. 10, pp. 12475–12489, Mar. 2021, doi: 10.1007/S11356-020-11256-3.
- 8) Saleh, T.A., 2022. Kinetic models and thermodynamics of adsorption processes: classification. In *Interface Science and Technology* (Vol. 34, pp. 65-97). Elsevier.
- 9) Kausar, A., Naeem, K., Iqbal, M., Nazli, Z.I.H., Bhatti, H.N., Ashraf, A., Nazir, A., Kusuma, H.S. and Khan, M.I., 2021. Kinetics, equilibrium and thermodynamics of dyes adsorption onto modified chitosan: a review. *Zeitschrift für Physikalische Chemie*, (0), p.000010151520191586.
- 10) Morsy, A., Taha, M.H., Saeed, M., Waseem, A., Riaz, M.A. and Elmaadawy, M.M., 2019. Isothermal, kinetic, and thermodynamic studies for solid-phase extraction of uranium (VI) via hydrazine-impregnated carbon-based material as efficient adsorbent. *Nuclear science and techniques*, 30, pp.1-11.

11) Mubark, A.E.,2024. Sequestration of zirconium and hafnium content using magnetic cellulose/chitosan nanocomposites from waste effluents, J. Water Process Eng. 58, 104759. <https://doi.org/10.1016/J.JWPE.2023.104759>.

**Table S2:** *The values of Morris-Weber model terms for Zr(IV) sorption using Zn/Al-LDH sorbent.*

|                               |                                  |       |
|-------------------------------|----------------------------------|-------|
| <b>Weber and Morris model</b> | <b>Stage I</b>                   |       |
|                               | $k_i$ (mg/g min <sup>1/2</sup> ) | 10.12 |
|                               | C                                | 18.1  |
|                               | R <sup>2</sup>                   | 0.97  |
|                               | <b>Stage II</b>                  |       |
|                               | $k_i$ (mg/g min <sup>1/2</sup> ) | 0.88  |
|                               | C                                | 78.3  |
|                               | R <sup>2</sup>                   | 0.96  |

**Table S3:** Zr(IV) desorption from loaded Zn/Al-LDH material using different solutions (0.5 g/L, room temperature; 120 min).

| <b>Eluent type</b>      | <b>Sorption efficiency, %</b> |
|-------------------------|-------------------------------|
| 1.0 M Hydrochloric acid | 98.1                          |
| 1.0 M Sulfuric acid     | 76.7                          |
| 1.0 M Nitric            | 64.3                          |

**Table S4:** Sorption/ desorption cycles for Zr(IV) recovery using *Zn/Al-LDH* material.

| No. of cycle | Zr(IV)   |            |
|--------------|----------|------------|
|              | Sorption | Desorption |
| 1            | 90.6     | 98.0       |
| 2            | 90.2     | 98.0       |
| 3            | 89.9     | 97.8       |
| 4            | 89.4     | 97.2       |
| 5            | 88.9     | 96.7       |
| 6            | 88.7     | 95.8       |

**Table S5.** Chemical composition of the real waste solution before, and after the adsorption process, as well as the adsorption efficiency.

| <b>Constituents</b>   | <b>C<sub>0</sub> mg/ L</b> | <b>C<sub>e</sub> mg/ L</b> | <b>E%</b> |
|-----------------------|----------------------------|----------------------------|-----------|
| Zr (IV)               | 120                        | 15                         | 87.5      |
| V (IV)                | 100                        | 97                         | 3.0       |
| Ti (IV)               | 66                         | 56                         | 15.2      |
| Fe(III)               | 230                        | 190                        | 17.4      |
| Na (I)                | 640                        | 622                        | 2.8       |
| K (I)                 | 252                        | 239                        | 5.2       |
| SO <sub>4</sub> (-II) | 980                        | 973                        | 1         |
